# Supplementary material for: Automatic Planning for Nasopharyngeal Carcinoma Based on Progressive Optimization in RayStation Treatment Planning System
Source: PubMed Central journal article supplement — Technol Cancer Res Treat. 2020 Jun 19;19:1533033820915710. doi: 10.1177/1533033820915710 (PMC7307279; doi:10.1177/1533033820915710), 2020-06-19
Supplement: CERTIFICATE-OF-ENGLISH-EDITING.pdf [file CERTIFICATE-OF-ENGLISH-EDITING.pdf]

# MedSci

Editing by professional editors

## CERTIFICATE OF ENGLISH EDITING

Date: 8<sup>th</sup>, Feb, 2020

This document certifies that the manuscript titled "Automatic planning for nasopharyngeal carcinoma based on progressive optimization in RayStation treatment planning system" was edited for proper English language, grammar, punctuation, spelling, and overall style by one or more of the highly qualified native English speaking editors at MedSci. Neither the research content nor the authors' intentions were altered in any way during the editing process.

Documents receiving this certification should be English-ready for publication - however, the author has the ability to accept or reject our suggestions and changes. To verify the final MedSci edited version, please visit our verification page. If you have any questions or concerns over this edited document, please contact MedSci at [editing@medsci.cn](mailto:editing@medsci.cn)

**Manuscript title:** Automatic planning for nasopharyngeal carcinoma based on progressive optimization in RayStation treatment planning system

**First Author:** Yiwei Yang

**Code:** 0802-6525-E334-924B-673A

This certificate may be verified at [www.medsciediting.com/certificate/](http://www.medsciediting.com/certificate/)

MedSci affiliated to BIOON Group, offers the services in paper evaluation, professional translation, language editing and publication support.

MedSci comprises a network of more than 300 editors with a biomedical background. All our editors must meet strict selection criteria. We require that each editor has completed or is attending a PhD graduate program at one of the top universities in the world. He or she must have proven written communication skills and undergo a comprehensive training period under the instruction of a managing editor. All editors are native English speakers.

We provide high quality services at the comparable price in the industry. For more information, please visit [www.medsciediting.com](http://www.medsciediting.com) or contact us by email at [editing@medsci.cn](mailto:editing@medsci.cn)
